# Supplementary material for: Genotyping and lipid profiling of 601 cultivated sunflower lines reveals novel genetic determinants of oil fatty acid content
Source: Research Square preprint supplement (doi:10.21203/rs.3.rs-108244/v1), 2020-11-16
Supplement: Supplementary file 4 [file ebdb0e999adfa7fef69ee3ce.xlsx]

## Sheet: All samples
Line_identificator	Collection	Illumina line in the run I1	barcode	Sequencing_id
A32/08 23-1121	AGROPLASMA	L007	TTCTGAG	s410
A32/08 308-111	AGROPLASMA	L001	CCTAGAT	s1
A40/08 36-1121	AGROPLASMA	L002	TTGGCAT	s97
А40/08 150-1111	AGROPLASMA	L002	TTCCACG	s98
А40/08 124(155-21111)	AGROPLASMA	L001	GATCTGG	s2
А40/08 155-22111	AGROPLASMA	L008	CGAGGTT	s506
А40/08 163-1111	AGROPLASMA	L008	AACAGAT	s507
А40/08 167-1111	AGROPLASMA	L008	GCCTCAC	s508
А40/08 197-1111	AGROPLASMA	L002	GGTTGAC	s99
А40/08 205-11111	AGROPLASMA	L007	CGTGGAG	s411
А40/08 254-1111	AGROPLASMA	L001	CTCTATG	s3
А40/08 280-1111	AGROPLASMA	L002	ATCTGTT	s100
А704/08 149-11111	AGROPLASMA	L001	CCGCATT	s4
А33/08 35-11111	AGROPLASMA	L007	ATTGCGT	s412
А33/08 51211	AGROPLASMA	L007	GTAACCT	s413
А33/08 14-1122	AGROPLASMA	L008	CCACGTC	s509
А33/08 35-2111	AGROPLASMA	L007	ACGTGAG	s414
А40/08 60-111	AGROPLASMA	L001	TTCCACG	s5
А40/08-150-2211	AGROPLASMA	L008	TGATCTC	s510
А40/08-162-111	AGROPLASMA	L008	CTAATGT	s511
А40/33-82-111	AGROPLASMA	L002	CGGAGGT	s101
ВС2ЦМС АР83 х В32Х36//ВМ08-41-12111	AGROPLASMA	L007	AACTCAG	s415
ВС2ЦМС АР83 х В32Х08//BF704XB08-14-1121	AGROPLASMA	L007	TTGTTAC	s416
ВС2ЦМС AP83 x B32X08//BF704XBM08-21-112	AGROPLASMA	L002	GAATACC	s102
ВС2ЦМС АР83 х BS33X08/BSH033XBM08-6-1112	AGROPLASMA	L007	CCGACTT	s417
ВС2ЦМС АР83 х BS33X08/BSH033XBM08-19-111	AGROPLASMA	L001	CGGAGGT	s6
ВС2ЦМС АР83 х BS33X08/BSH033XBM08-12111	AGROPLASMA	L001	TGCTACC	s7
ВС2ЦМС АР83 х BS33X08/BSH033XBM08-31-11112	AGROPLASMA	L008	GGAATAC	s512
ВС2ЦМС АР83 х B40X08/BF704XBM08-4-2112	AGROPLASMA	L008	TTCTAGT	s513
ВС2ЦМС АР83 х В40Х08/BF704XB08-32-112	AGROPLASMA	L007	ATCTGTT	s418
ВС2ЦМС АР83 х ВМ40XBM08/BF704XBM08-50-1212	AGROPLASMA	L001	TGTTCAG	s8
ВС2ЦМС АР83 х BM40XBS33/BM08-15-21121	AGROPLASMA	L007	CACACGT	s419
ВС2ЦМС АР83 х BM32XBS33/BM36-7-1111	AGROPLASMA	L002	ACGTTGT	s103
ВС2ЦМС АР83 х BM32XBS33/BM36-72-1111	AGROPLASMA	L007	ACTTCTG	s420
ВС2ЦМС АР83 х BM32XBM08/BM08-14-12-111	AGROPLASMA	L008	TTCACTG	s514
ВС2ЦМС АР83 х BM32XBM08/BM08-19-11111	AGROPLASMA	L002	ATGTTCG	s104
ВС2ЦМС АР83 х BM32XBM08/BM08-24-111	AGROPLASMA	L001	CGAGGTT	s9
ВС2ЦМС АР83 х BM32XBM08/BM08-29-1111	AGROPLASMA	L008	CCGTAAC	s515
ВС2ЦМС АР83 х BM32XBM08/BM08-33-21111	AGROPLASMA	L008	GTTGAGC	s516
ВС2ЦМС АР83 х BM32XBM08/BM08-83-22121	AGROPLASMA	L001	CTAATGT	s10
ВС2ЦМС АР83 х В47/704-8	AGROPLASMA	L001	ATGCCGG	s11
ВС2ЦМС АР83 х BHO33/704//47-2	AGROPLASMA	L008	GAATACC	s517
ВС2ЦМС АР83 х BM40XBS33/BM08-25-211	AGROPLASMA	L001	CCTGCAC	s12
ВС2ЦМС AP83 x C0SB-5	AGROPLASMA	L008	CCGCATT	s518
AP83X B08/P83-24211113	AGROPLASMA	L001	CGTGGAG	s13
AP83X B08/P83-24221113	AGROPLASMA	L007	TTGGCAT	s421
AP83X B08/83-31211211	AGROPLASMA	L008	TTAGCCG	s519
AP83X B08/P83-33421111	AGROPLASMA	L002	TTGTTAC	s105
AP83X BC1MB08/BP83-3322	AGROPLASMA	L002	GAGGCTG	s106
AP83X B08/P83-33421111/3322	AGROPLASMA	L007	GAGGCTG	s422
AP83X B40/P83-123111	AGROPLASMA	L002	GCCTCAC	s107
AP83X BC1-B40//P83-32112	AGROPLASMA	L001	GGACTCG	s14
AP83X BC1BM08//BP83-13211	AGROPLASMA	L001	ACCATAG	s15
AP83X BC1BM08//BP83-13211/1522	AGROPLASMA	L008	ATCTTGC	s520
AP83X BC1BM40//BP83-321111	AGROPLASMA	L002	CCTGCAC	s108
AP83X S5BC1-08//BP83-123	AGROPLASMA	L007	GATGGCT	s423
AP83X S5BC1-08//BP83-1821	AGROPLASMA	L002	CCGCATT	s109
AP83X S5BC1-08//BP83-1824	AGROPLASMA	L008	GTAACCT	s521
AP83X BM40///BP83-1	AGROPLASMA	L007	GATAGGC	s424
AP83X BM40///BP83-2	AGROPLASMA	L007	TGCGAGG	s425
AP83X BM40///BP83-3	AGROPLASMA	L008	GGACTCG	s522
AP83X BM08///BP83-1	AGROPLASMA	L001	CCACCGT	s16
AP83X B08/P83-24211113	AGROPLASMA	L008	GTTCGAT	s523
AP83X BC1-B40//P83-32112	AGROPLASMA	L008	CAGGTGG	s524
AP83X BC1BM40//BP83-321111	AGROPLASMA	L007	TAGGCGC	s426
RP38	AGROPLASMA	L001	TAACTGC	s17
RP38YL	AGROPLASMA	L002	ACTTCTG	s110
RP1	AGROPLASMA	L002	AGAAGTC	s111
RP14	AGROPLASMA	L002	GATCTGG	s112
RP24	AGROPLASMA	L007	CGATGCG	s427
Rlg3	AGROPLASMA	L001	AGAAGTC	s18
Rlg42	AGROPLASMA	L008	GGACATC	s525
R10	AGROPLASMA	L001	ATGTTCG	s19
RNM	AGROPLASMA	L008	TAAGAAC	s526
412pl	AGROPLASMA	L007	GCCAACT	s428
4120pl	AGROPLASMA	L008	AGCCGGT	s527
RR144	AGROPLASMA	L008	AACAATG	s528
ФР81013	AGROPLASMA	L007	GAACAAT	s429
R10YL	AGROPLASMA	L008	TACTGTC	s529
RS//R10-132226	AGROPLASMA	L008	ACGTGAG	s530
RS//R10-132151	AGROPLASMA	L007	TAACTGC	s430
RS//R10-13/5B	AGROPLASMA	L008	TTCCACG	s531
R10/1231	AGROPLASMA	L007	AGCCGGT	s431
R10CLP-C1	AGROPLASMA	L007	CCTACCG	s432
Rdlf	AGROPLASMA	L007	GGACTCG	s433
4090pl	AGROPLASMA	L008	TGCCTAG	s532
Rd1	AGROPLASMA	L007	AAGGTCT	s434
4093pl	AGROPLASMA	L007	AAGCGTG	s435
RS15	AGROPLASMA	L002	ATCTTGC	s113
RS25	AGROPLASMA	L001	ACTCGCT	s20
4087pl	AGROPLASMA	L008	CCACCGT	s533
RS64	AGROPLASMA	L008	CCATTGC	s534
RC32(nord)	AGROPLASMA	L001	AGACCTT	s21
R6	AGROPLASMA	L001	AACGAGT	s22
RK35	AGROPLASMA	L002	GGACTCG	s114
4099pl	AGROPLASMA	L007	GTTACTC	s436
RR154	AGROPLASMA	L001	GTTACTC	s23
4117pl	AGROPLASMA	L008	TTGTTAC	s535
4099pl	AGROPLASMA	L007	ATGTTCG	s437
RD 164	AGROPLASMA	L007	CTCTATG	s438
RR114	AGROPLASMA	L008	TATGTTC	s536
4K738/R6-12111	AGROPLASMA	L008	ATTGCGT	s537
4K738/R6-4111	AGROPLASMA	L007	CCGGTAT	s439
RCM//R6-8211	AGROPLASMA	L008	CACATCG	s538
RCM///R6-31212	AGROPLASMA	L001	TGTAACT	s24
RCM///R6-3312	AGROPLASMA	L002	TTCTAGT	s115
RCM//R6-6312	AGROPLASMA	L007	GTTGAGC	s440
4096	AGROPLASMA	L007	GATCTGG	s441
4102	AGROPLASMA	L007	AGACCTT	s442
7678-2513	AGROPLASMA	L002	TAGAACG	s116
RF 12	AGROPLASMA	L001	GTAGGTC	s25
Rfob	AGROPLASMA	L001	GATAGGC	s26
R483	AGROPLASMA	L002	TGCTACC	s117
R60880	AGROPLASMA	L007	TTAGCCG	s443
R60875	AGROPLASMA	L008	CCTCAGC	s539
R60875CLP12	AGROPLASMA	L008	ATGTTCG	s540
RS3	AGROPLASMA	L001	CCACGTC	s27
R4	AGROPLASMA	L008	GATAGGC	s541
R4CLP	AGROPLASMA	L002	TAGGCGC	s118
R-fly	AGROPLASMA	L001	GAACAAT	s28
RBY	AGROPLASMA	L002	GGACATC	s119
RMO2	AGROPLASMA	L008	AGCTTCT	s542
RMO2CLP	AGROPLASMA	L008	GAACAAT	s543
R-ramb	AGROPLASMA	L007	AACGTAC	s444
RK325	AGROPLASMA	L007	CCACGTC	s445
RK806	AGROPLASMA	L007	CTAATGT	s446
RK-alz	AGROPLASMA	L007	TACTGTC	s447
Ralz	AGROPLASMA	L008	TGCGAGG	s544
RK-BLR	AGROPLASMA	L008	AGACCTT	s545
RL-mgs	AGROPLASMA	L001	AGCTTCT	s29
RL 65/35	AGROPLASMA	L001	GCCAACT	s30
R-eL	AGROPLASMA	L001	AGTAAGC	s31
R-exp	AGROPLASMA	L008	CCAATTG	s546
RT085	AGROPLASMA	L002	TGAACAT	s120
Rcrb	AGROPLASMA	L007	GCCTCAC	s448
Rs65HO	AGROPLASMA	L007	GAGTGCG	s449
9758R	AGROPLASMA	L007	CGAGGTT	s450
9802R	AGROPLASMA	L008	GGAGACT	s547
RC61	AGROPLASMA	L007	ATTCTTG	s451
RC61CLP41	AGROPLASMA	L001	TTGCATC	s32
RC8505	AGROPLASMA	L008	GTTACTC	s548
R67	AGROPLASMA	L001	GGATCGT	s33
AM32CLP	AGROPLASMA	L008	TTCTGAG	s549
AC42CLP	AGROPLASMA	L008	CCTGACT	s550
AM078CLP	AGROPLASMA	L002	GAACAAT	s121
AMO33	AGROPLASMA	L008	GTGGACG	s551
AMO8	AGROPLASMA	L001	GGACATC	s34
K 223	VNIMK	L002	GCCAACT	s122
K 225	VNIMK	L007	GGACATC	s452
K 370	VNIMK	L002	TTCTGAG	s123
K 562	VNIMK	L008	CGGAGGT	s552
K 581	VNIMK	L008	GTAGGTC	s553
K 651-3	VNIMK	L007	CCAATTG	s453
K 912	VNIMK	L002	CCTCAGC	s124
K 1391	VNIMK	L001	AACAGAT	s35
K 1459	VNIMK	L007	ACCATAG	s454
K 1505	VNIMK	L007	AACAATG	s455
K 1594	VNIMK	L007	CCTCTAG	s456
K 1687	VNIMK	L007	TTCCACG	s457
K 2068	VNIMK	L001	ACTTCTG	s36
K 2086	VNIMK	L001	GGAACTG	s37
K 2125	VNIMK	L002	AAGGTCT	s125
K 2235	VNIMK	L007	TGGCAGT	s458
K 2238	VNIMK	L008	CCGATCC	s554
K 2257	VNIMK	L002	ATTCTTG	s126
K 2462	VNIMK	L002	CCAATTG	s127
K 2479	VNIMK	L001	TACTGTC	s38
K 3035	VNIMK	L002	CCGACTT	s128
K 3059	VNIMK	L001	TTGTTAC	s39
K 3159	VNIMK	L008	TGGCAGT	s555
K 3350	VNIMK	L008	GGTTGAC	s556
K 3376	VNIMK	L008	AACGTAC	s557
Сл 1721	VNIMK	L008	TGCTACC	s558
Сл 1790	VNIMK	L007	AGAAGTC	s459
Сл 1813	VNIMK	L001	CCTACCG	s40
Сл 2039	VNIMK	L007	TTGAGGC	s460
Сл 2950	VNIMK	L001	TTAGCCG	s41
ВА 1	VNIMK	L008	GATCTGG	s559
ВА 4	VNIMK	L001	GAGGCTG	s42
ВИР 130-1	VNIMK	L002	CGTGGAG	s129
ВИР 172	VNIMK	L001	GAGTGCG	s43
ВИР 369	VNIMK	L007	GACCTCT	s461
ВИР 391	VNIMK	L001	GGAGACT	s44
ВК 15	VNIMK	L001	TAAGAAC	s45
ВК 30	VNIMK	L007	AGCTTCT	s462
ВК 102	VNIMK	L002	CCTAGAT	s130
ВК 206	VNIMK	L001	TTGGCAT	s46
ВК 268	VNIMK	L007	CCGCATT	s463
ВК 416	VNIMK	L008	GACCTCT	s560
ВК 428	VNIMK	L001	TTCACTG	s47
ВК 464	VNIMK	L001	GCCTCAC	s48
ВК 474	VNIMK	L001	TGATCTC	s49
ВК 475	VNIMK	L002	GGAACTG	s131
ВК 519	VNIMK	L001	ATTGCGT	s50
ЛГ 3	VNIMK	L007	CAGGTGG	s464
ЛГ 8-2	VNIMK	L007	GTTCGAT	s465
ЛГ 10	VNIMK	L002	AACAGAT	s132
ЛГ 26	VNIMK	L007	CCGATCC	s466
ЛГ 27	VNIMK	L001	AGTGGCC	s51
ЛГ 28	VNIMK	L007	TGAACAT	s467
КГ 7	VNIMK	L002	GGAATAC	s133
КГ 16	VNIMK	L002	AAGCGTG	s134
КГ 19	VNIMK	L008	TGTAACT	s561
КГ 21	VNIMK	L008	GAGGCTG	s562
КГ 32	VNIMK	L002	GTTGAGC	s135
КГ 48	VNIMK	L007	ATGCCGG	s468
КГ 104	VNIMK	L008	CTCTATG	s563
Л 1392	VNIMK	L008	CACACGT	s564
Л 2090	VNIMK	L008	TAGAACG	s565
л 2138	VNIMK	L001	TGGCAGT	s52
Л 2532	VNIMK	L008	AAGCGTG	s566
Л 2543	VNIMK	L002	ATTGCGT	s136
Л 2544	VNIMK	L007	ACGTTGT	s469
Л 2563	VNIMK	L001	AAGCGTG	s53
Л 2582	VNIMK	L007	CCGTAAC	s470
Л 2586	VNIMK	L001	TTGAGGC	s54
Л 2595	VNIMK	L001	CACATCG	s55
Л 3376	VNIMK	L007	AACGAGT	s471
Л 7247	VNIMK	L007	CCTCAGC	s472
М 1046	VNIMK	L008	TTGGCAT	s567
И7-235	VNIMK	L001	CGATGCG	s56
И7-246	VNIMK	L008	GAGTGCG	s568
1416-5	VNIMK	L007	GTGGACG	s473
355114	VNIMK	L007	GGAACTG	s474
МВГ-3	VNIMK	L007	GGAATAC	s475
МВГ-8	VNIMK	L007	TGTAACT	s476
Б 2073	VNIMK	L008	ATGCCGG	s569
№ 424924	VNIMK	L002	ATGCCGG	s137
№ 577083	VNIMK	L008	ATTCTTG	s570
№ 577432	VNIMK	L001	ACGTGAG	s57
№ 577433	VNIMK	L002	CCACCGT	s138
AH 512 Rf	VNIMK	L008	CGATGCG	s571
AH 70029 Rf	VNIMK	L002	CCTACCG	s139
НА 89	VNIMK	L008	ACTTCTG	s572
RHA 265-1	VNIMK	L008	AGAAGTC	s573
RHA 274-1	VNIMK	L001	CCGACTT	s58
RHA 297	VNIMK	L002	GGAGACT	s140
RHA 298	VNIMK	L007	ATGGCTC	s477
Sl 2966	VNIMK	L001	CCAATTG	s59
Z 231	VNIMK	L008	GCCAACT	s574
Z 1064	VNIMK	L007	CCTGCAC	s478
ZB х 231 AC	VNIMK	L008	TGTTCAG	s575
Черняка 66-2	VNIMK	L007	GGATCGT	s479
ЖС-17	VNIMK	L001	CCATTGC	s60
I4BC4 ANN 2188	VNIMK	L002	AGTGGCC	s141
I4BC4 ANN 2165	VNIMK
I4BC4PET 2203	VNIMK	L002	TAACTGC	s142
ВК 680А	VNIMK	L007	ATCTTGC	s480
ВК 732А	VNIMK	L007	AGTAAGC	s481
ВК 905А	VNIMK	L002	CCTCTAG	s143
ВК 934А	VNIMK	L008	AACGAGT	s576
ВК 935А	VNIMK	L001	TGCGAGG	s61
ВК 932А	VNIMK	L001	AGCCGGT	s62
ВК 623А	VNIMK	L008	AGTGGCC	s577
ВК 901А	VNIMK	L001	CCTGACT	s63
ВК 902А	VNIMK	L007	TGCCTAG	s482
ВК 903А	VNIMK	L008	GGAACTG	s578
ВК 904А	VNIMK	L001	CCGTAAC	s64
ВК 906А	VNIMK	L001	TGAACAT	s65
ВК 900А	VNIMK	L001	AACGTAC	s66
ВК 927А	VNIMK	L007	AGTGGCC	s483
ВК 931А	VNIMK	L001	TAGGCGC	s67
ВК276А	VNIMK	L001	GGAATAC	s68
СЛ12-3732Б	VNIMK	L007	TCTCGAC	s484
СЛ12-3876Б	VNIMK	L007	AACAGAT	s485
СЛ13-2258Б	VNIMK	L008	CCTACCG	s579
СЛ14-4632Б	VNIMK	L001	CCTCTAG	s69
СЛ14-4658Б	VNIMK	L001	GACCTCT	s70
СЛ14-4662Б	VNIMK	L001	TGCCTAG	s71
СЛ14-4646Б	VNIMK	L001	CAGGTGG	s72
СЛ15-4488Б 2203	VNIMK	L008	GGATCGT	s580
СЛ15-4490Б 2205	VNIMK	L008	ACTCGCT	s581
СЛ15-4498Б 2209	VNIMK	L008	CCGACTT	s582
СЛ01-3839А 4383	VNIMK	L001	AACTCAG	s73
ВК499А 4355	VNIMK	L001	TCTCGAC	s74
СЛ15-4038А 4403	VNIMK	L007	TGCTACC	s486
СЛ01-3856А 4397	VNIMK	L001	GTTGAGC	s75
СЛ15-4508Б 2217	VNIMK	L007	GAATACC	s487
СЛ15-4464Б 2195	VNIMK	L002	AACAATG	s144
СЛ15-4480Б 2201	VNIMK	L001	ATGGCTC	s76
СЛ15-4476Б 2197	VNIMK	L002	TAAGAAC	s145
СЛ15-4472Б 2199	VNIMK	L008	ATCTGTT	s583
СЛ15-4520Б 2223	VNIMK	L007	CCATTGC	s488
СЛ15-4526Б 2229	VNIMK	L008	TCTCGAC	s584
СЛ15-4574Б 2275	VNIMK	L008	TAGGCGC	s585
СЛ15-4550Б 2273	VNIMK	L001	TTCTGAG	s77
СЛ15-4544Б 2271	VNIMK	L002	TGCCTAG	s146
СЛ15-4544А 2270	VNIMK	L007	ACTCGCT	s489
СЛ15-4514Б 2267	VNIMK	L001	ATCTGTT	s78
СЛ15-4528Б 2231	VNIMK	L002	CCTGACT	s147
СЛ15-4542Б 2241	VNIMK	L008	ATGGCTC	s586
СЛ15-4536Б 2263	VNIMK	L001	CACACGT	s79
СЛ15-4798Б 2259	VNIMK	L002	ATGGCTC	s148
ВК838А 2064	VNIMK	L007	TAGAACG	s490
СЛ13-2210А 2256	VNIMK	L007	GTAGGTC	s491
СЛ09-4750А 2970	VNIMK	L008	TAACTGC	s587
СЛ13-2186А 2076	VNIMK	L008	ACGTTGT	s588
СЛ13-2182А 2074	VNIMK	L008	TTGAGGC	s589
СЛ06-2545А 2038	VNIMK	L002	CGATGCG	s149
СЛ05-4154А 2036	VNIMK	L008	AAGGTCT	s590
СЛ13-2190А 2086	VNIMK	L001	GTTCGAT	s80
СЛ05-16А 2090	VNIMK	L001	CCTCAGC	s81
СЛ13-2756А 2254	VNIMK	L001	GTAACCT	s82
СЛ13-2260А 2252	VNIMK	L008	CCGGTAT	s591
СЛ13-2258А 2250	VNIMK	L008	ACCATAG	s592
СЛ13-2280А 2112	VNIMK	L007	TGTTCAG	s492
СЛ13-2224А 2110	VNIMK	L001	CCGGTAT	s83
СЛ13-2302А 2106	VNIMK
СЛ13-2226А 2102	VNIMK	L008	AGTAAGC	s593
СЛ13-2218А 2098	VNIMK	L001	AAGGTCT	s84
СЛ13-2206А 2092	VNIMK	L008	TGAACAT	s594
СЛ13-2220А 2100	VNIMK	L007	TATGTTC	s493
СЛ15-4500Б 2265	VNIMK	L008	CCTCTAG	s595
СЛ13-2270Б 2121	VNIMK	L002	TACTGTC	s150
СЛ16-2278Б 2279	VNIMK	L008	TTGCATC	s596
СЛ16-2286Б 2287	VNIMK	L001	GATGGCT	s85
СЛ16-2282Б 2283	VNIMK	L008	CCTAGAT	s597
СЛ16-2290Б 2291	VNIMK	L001	GGTTGAC	s86
СЛ16-2284Б 2285	VNIMK	L008	GATGGCT	s598
СЛ16-2292Б 2293	VNIMK	L001	TATGTTC	s87
СЛ16-2290Б 2291	VNIMK	L007	CCTAGAT	s494
СЛ15-4472Б 2295	VNIMK	L001	ACGTTGT	s88
СЛ11-5244Б 2143	VNIMK	L001	GTGGACG	s89
СЛ05-4770А 2084	VNIMK	L002	CGAGGTT	s151
ВК276Б 4244	VNIMK	L008	CCTGCAC	s599
СЛ01-3828А 2021	VNIMK	L001	TAGAACG	s90
СЛ13-2210А 2256	VNIMK	L002	GACCTCT	s152
СЛ13-2232Б 2145	VNIMK	L002	CACACGT	s153
СЛ15-4512Б 4533	VNIMK	L007	TTGCATC	s495
СЛ16-2288Б 2289	VNIMK	L001	AACAATG	s91
СЛ11-5244Б 2143	VNIMK	L001	CCGATCC	s92
ВК678А 2007	VNIMK	L007	TTCACTG	s496
ВК639А 2005	VNIMK	L001	ATCTTGC	s93
ВК464А 2003	VNIMK	L007	TAAGAAC	s497
СЛ13-2256А 2114	VNIMK	L007	CCACCGT	s498
ВК861А 2116	VNIMK	L007	GGAGACT	s499
СЛ13-2270А 2120	VNIMK	L008	CGTGGAG	s600
СЛ13-2268А 2118	VNIMK	L007	CCTGACT	s500
СЛ13-2284А 2122	VNIMK	L008	AACTCAG	s601
СЛ13-2288А 2124	VNIMK	L007	TTCTAGT	s501
СЛ14-4638Б 2249	VNIMK	L007	TGATCTC	s502
СЛ13-2228А 2140	VNIMK	L001	GAATACC	s94
ВК653А 2136	VNIMK	L007	GGTTGAC	s503
СЛ15-2294А 2126	VNIMK	L001	ATTCTTG	s95
СЛ13-2246А	VNIMK	L007	CACATCG	s504
СЛ13-2258А	VNIMK	L007	CGGAGGT	s505
СЛ13-2260А	VNIMK	L002	TTGAGGC	s154
2261х 62З2	VNIMK	L001	TTCTAGT	s96
ВИР 100А	VIR	L005	GATAGGC	s407
ВИР 100Б	VIR
ВИР 101А	VIR	L004	CACATCG	s339
ВИР 101Б	VIR	L003	GAATACC	s240
ВИР 111А	VIR	L004	CCTACCG	s342
ВИР 114А	VIR	L004	ACGTTGT	s335
ВИР 114Б	VIR	L005	ATCTGTT	s401
ВИР 116А	VIR	L003	CCACCGT	s231
ВИР 116Б	VIR	L005	TTGGCAT	s402
ВИР 117А	VIR	L003	AACAATG	s234
ВИР 117Б	VIR	L005	AAGGTCT	s404
ВИР 125	VIR	L004	ATCTTGC	s325
ВИР 128	VIR	L003	CGAGGTT	s157
ВИР 129А	VIR	L005	CCGACTT	s403
ВИР 129Б	VIR	L003	CTAATGT	s233
ВИР 130Б	VIR	L004	TTGTTAC	s322
ВИР 136	VIR	L003	CTCTATG	s155
ВИР 137Б	VIR	L005	ATGTTCG	s405
ВИР 138А	VIR	L004	GGACATC	s336
ВИР 138Б	VIR	L003	TGTAACT	s232
ВИР 140	VIR	L003	CCAATTG	s215
ВИР 151А	VIR	L003	GGTTGAC	s237
ВИР 151RIGO	VIR
ВИР 151Б	VIR	L004	TGTAACT	s338
ВИР 156	VIR	L003	CCGGTAT	s171
ВИР 162	VIR	L003	CGGAGGT	s179
ВИР 165	VIR	L004	CCTCTAG	s251
ВИР 171	VIR	L003	CCGCATT	s182
ВИР 172А	VIR	L003	AACGAGT	s228
ВИР 172Б	VIR	L004	ACCATAG	s332
ВИР 177	VIR	L004	CTAATGT	s273
ВИР 183	VIR	L004	AGCCGGT	s287
ВИР 184	VIR	L004	TTCACTG	s326
ВИР 190	VIR	L003	AACAGAT	s170
ВИР 195	VIR
ВИР 196	VIR	L004	CCGATCC	s253
ВИР 197	VIR	L004	AACGAGT	s294
ВИР 200Б	VIR
ВИР 205А	VIR	L003	TGCCTAG	s238
ВИР 210	VIR	L005	CCTCTAG	s356
ВИР 211	VIR	L004	GAACAAT	s295
ВИР 215А	VIR	L003	ATTGCGT	s236
ВИР 215Б	VIR	L004	CCACCGT	s337
ВИР 229А	VIR	L004	AGTGGCC	s296
ВИР 229Б	VIR	L004	AAGGTCT	s334
ВИР 230	VIR	L004	CCATTGC	s274
ВИР 234	VIR	L003	CACATCG	s158
ВИР 263	VIR	L005	ACGTTGT	s373
ВИР 278	VIR	L003	GATAGGC	s218
ВИР 319	VIR	L005	CGGAGGT	s358
ВИР 328	VIR	L004	GACCTCT	s318
ВИР 338	VIR	L005	TTCTGAG	s390
ВИР 339	VIR	L004	AACAATG	s297
ВИР 340Б	VIR
ВИР 343	VIR	L004	GTTGAGC	s329
ВИР 349	VIR	L003	GTGGACG	s161
ВИР 362	VIR	L003	CCTGACT	s217
ВИР 364	VIR	L003	TTGGCAT	s188
ВИР 369	VIR	L005	CCTGCAC	s374
ВИР 370	VIR	L003	GACCTCT	s189
ВИР 371	VIR	L004	CCGTAAC	s298
ВИР 376	VIR	L005	CCAATTG	s348
ВИР 378	VIR	L003	GATGGCT	s190
ВИР 381	VIR	L005	TAGAACG	s349
ВИР 386	VIR	L003	TGCTACC	s191
ВИР 388	VIR	L005	TAAGAAC	s376
ВИР 395	VIR	L003	TAGAACG	s192
ВИР 421	VIR
ВИР 435А	VIR
ВИР 436Б	VIR
ВИР 438	VIR	L004	AACTCAG	s299
ВИР 445	VIR	L004	TGATCTC	s331
ВИР 446	VIR	L003	TAGGCGC	s224
ВИР 448	VIR	L003	AACGTAC	s225
ВИР 450	VIR	L004	ATTCTTG	s256
ВИР 452	VIR	L004	GTTACTC	s300
ВИР 453	VIR	L005	AACAATG	s395
ВИР 456	VIR	L005	CCTACCG	s397
ВИР 471А	VIR	L003	TGGCAGT	s229
ВИР 471Б	VIR	L003	CCGACTT	s230
ВИР 479	VIR	L003	TTGCATC	s216
ВИР 480	VIR	L003	ATGTTCG	s193
ВИР 490	VIR	L005	GAACAAT	s377
ВИР 501	VIR	L005	GGACATC	s360
ВИР 581	VIR	L003	CGTGGAG	s194
ВИР 584	VIR	L004	TTCCACG	s301
ВИР 630	VIR	L005	CCTAGAT	s378
ВИР 631	VIR	L003	CCATTGC	s195
ВИР 632	VIR	L003	CCTGCAC	s162
ВИР 633	VIR	L004	CACACGT	s303
ВИР 634	VIR	L003	ATCTTGC	s196
ВИР 635	VIR	L003	GTTCGAT	s163
ВИР 636	VIR	L004	TGTTCAG	s304
ВИР 637	VIR	L004	GGACTCG	s258
ВИР 641	VIR	L004	GGAGACT	s259
ВИР 644	VIR	L004	CCACGTC	s305
ВИР 645	VIR	L004	TGGCAGT	s306
ВИР 646	VIR	L003	GAGGCTG	s221
ВИР 648	VIR	L004	GTAGGTC	s319
ВИР 649	VIR	L004	GTAACCT	s260
ВИР 651	VIR	L005	TTCCACG	s351
ВИР 652	VIR	L004	GCCTCAC	s307
ВИР 655	VIR	L004	ATTGCGT	s308
ВИР 656	VIR	L003	TTCACTG	s197
ВИР 658	VIR	L004	ATGTTCG	s261
ВИР 665	VIR	L003	CACACGT	s212
ВИР 679	VIR	L005	CCTGACT	s399
ВИР 682	VIR	L003	TAACTGC	s198
ВИР 684	VIR	L004	TGCTACC	s309
ВИР 692	VIR	L004	AGAAGTC	s275
ВИР 697	VIR	L004	AGCTTCT	s310
ВИР 700	VIR	L003	GCCAACT	s199
ВИР 702	VIR	L004	GAATACC	s311
ВИР 703	VIR	L005	TGCCTAG	s379
ВИР 704	VIR	L005	ATGCCGG	s380
ВИР 708	VIR	L005	GGAATAC	s391
ВИР 725	VIR	L003	TTCCACG	s174
ВИР 726	VIR	L003	GTAACCT	s200
ВИР 728	VIR	L003	TTCTGAG	s223
ВИР 730	VIR	L004	CCTCAGC	s327
ВИР 734	VIR	L005	AAGCGTG	s359
ВИР 739	VIR	L004	CCTGACT	s312
ВИР 740	VIR	L005	GGAACTG	s388
ВИР 743	VIR	L003	GAGTGCG	s201
ВИР 745	VIR	L005	ATTCTTG	s361
ВИР 747	VIR	L005	TTCTAGT	s396
ВИР 749	VIR	L005	ATGGCTC	s398
ВИР 751	VIR	L004	CCTGCAC	s314
ВИР 752	VIR	L004	TTGAGGC	s262
ВИР 753	VIR	L003	GGAACTG	s202
ВИР 755	VIR	L005	TACTGTC	s364
ВИР 757	VIR	L005	GGTTGAC	s381
ВИР 758	VIR	L004	CCTAGAT	s263
ВИР 759	VIR	L004	TGAACAT	s264
ВИР 762	VIR	L005	GGAGACT	s382
ВИР 763	VIR	L004	AGACCTT	s265
ВИР 764	VIR	L003	AAGCGTG	s164
ВИР 765	VIR	L003	ATGGCTC	s187
ВИР 767	VIR	L005	GCCAACT	s352
ВИР 768	VIR	L005	GAGGCTG	s353
ВИР 769	VIR	L005	ATCTTGC	s354
ВИР 770	VIR	L003	GCCTCAC	s165
ВИР 772	VIR	L003	ACGTTGT	s208
ВИР 776	VIR	L003	TATGTTC	s203
ВИР 777	VIR	L004	TTAGCCG	s266
ВИР 786	VIR	L005	TTAGCCG	s392
ВИР 787	VIR	L003	GGAATAC	s214
ВИР 796	VIR	L004	TTCTAGT	s267
ВИР 800	VIR	L003	TGCGAGG	s166
ВИР 817	VIR	L005	GCCTCAC	s383
ВИР 819	VIR	L005	TGCTACC	s371
ВИР 821	VIR	L003	AACTCAG	s175
ВИР 823	VIR	L003	AGTAAGC	s204
ВИР 825	VIR	L004	TATGTTC	s276
ВИР 830	VIR	L004	GAGTGCG	s289
ВИР 832	VIR	L004	CAGGTGG	s290
ВИР 833	VIR	L004	GGAATAC	s291
ВИР 836	VIR	L004	CCGCATT	s316
ВИР 839	VIR	L003	AAGGTCT	s185
ВИР 840	VIR	L004	CCGGTAT	s293
ВИР 841	VIR	L005	GACCTCT	s372
ВИР 843	VIR	L003	CCTAGAT	s205
ВИР 846	VIR	L003	ATGCCGG	s245
ВИР 847	VIR	L003	GGACTCG	s246
ВИР 848	VIR	L005	GAATACC	s408
ВИР 849	VIR	L004	CCAATTG	s343
ВИР 850	VIR	L003	CAGGTGG	s247
ВИР 855	VIR	L003	CGATGCG	s248
ВИР 858	VIR	L004	TAACTGC	s344
ВИР 859	VIR	L005	GTTGAGC	s409
ВИР 860	VIR	L003	TTGAGGC	s249
ВИР 900	VIR
ВИР 902	VIR	L005	CCTCAGC	s386
ВИР 903	VIR	L004	CTCTATG	s324
ВИР АМ	VIR
АД-66	VIR	L004	CGGAGGT	s271
L 2088	VIR	L004	CCGACTT	s269
ВД-690	VIR	L003	ACCATAG	s168
СМ 13	VIR	L003	CCACGTC	s180
СМ 27	VIR
СМ 32	VIR	L004	ATCTGTT	s286
СМ 150	VIR	L004	ACTCGCT	s280
СМ 338	VIR
СМ 359	VIR	L003	CCGATCC	s178
СМ 597	VIR	L005	CACACGT	s400
РI 331174	VIR
ТА 716-18	VIR	L004	GGAACTG	s283
ТА 717	VIR
ТА 728	VIR	L003	CCTACCG	s181
ТА 6463	VIR	L004	GGTTGAC	s272
RIL-80	VIR	L004	CGATGCG	s317
RIL-130	VIR	L004	TTGGCAT	s268
RIL-341	VIR
RIL-353	VIR
RIL-365	VIR
ВБ-273	VIR	L004	TTGCATC	s279
ВК 571	VIR	L003	TTAGCCG	s183
ВК 17	VIR	L005	GATCTGG	s367
ВК 20	VIR	L005	TTGTTAC	s355
ВК 47	VIR	L003	AGCTTCT	s169
ВК 51	VIR	L004	ACGTGAG	s281
ВК 54	VIR
ВК 580	VIR	L005	CCACCGT	s366
с.Зеленка	VIR
с.ВНИИМК 8932	VIR
с.Прогресс	VIR
с.Армавирский 1813	VIR
с.Армавирский 9345	VIR
с.Спутник	VIR
с.Чернянка 35	VIR
HS 310	VIR
У.З.Р.2-19	VIR
xxx????k-1532	VIR
Д-49 х 1069	VIR
xxxx??? K-2238	VIR
x 2006	VIR
Guaycan YNTA	VIR
x 782 Rf	VIR	L005	TAGGCGC	s365
ВИР 110А	VIR	L003	GGAGACT	s244
ВИР 110Б	VIR
ВИР 137А	VIR	L003	ACTCGCT	s235
ВИР 143	VIR	L004	GATAGGC	s282
ВИР 158	VIR
ВИР 159	VIR	L004	GCCAACT	s252
ВИР 220	VIR	L004	AAGCGTG	s254
ВИР 229А	VIR	L004	CGTGGAG	s333
ВИР 249	VIR	L003	AGACCTT	s159
ВИР 260	VIR	L004	TAGAACG	s255
ВИР 265	VIR	L003	TGTTCAG	s172
ВИР 283	VIR	L003	ACTTCTG	s173
ВИР 302	VIR	L003	TACTGTC	s160
ВИР 365	VIR	L004	AGTAAGC	s330
ВИР 387	VIR	L005	TAACTGC	s375
ВИР 449	VIR	L005	ATTGCGT	s350
ВИР 488	VIR	L004	GTTCGAT	s321
ВИР 580	VIR	L004	GAGGCTG	s257
ВИР 607	VIR	L003	TAAGAAC	s211
ВИР 674	VIR	L003	GGATCGT	s226
ВИР 788	VIR	L004	ATGCCGG	s328
ВИР 791	VIR	L003	CCGTAAC	s207
ВИР 795	VIR	L005	TTGAGGC	s369
ВИР 815	VIR	L003	GTTACTC	s210
ВИР 818	VIR	L005	CCGCATT	s370
ВИР 826	VIR	L004	TCTCGAC	s320
КГ-49	VIR	L003	GTTGAGC	s213
НА 89А	VIR	L003	AGCCGGT	s241
НА 89Б	VIR	L004	TAGGCGC	s340
СМ 142	VIR	L003	ATTCTTG	s177
RIL-258/1	VIR
RIL 265	VIR
Ждановский 6432	VIR
ВНИИМК 8931	VIR	L003	AGAAGTC	s156
с. Одесский 19	VIR
ВИР 106Б	VIR	L003	ATCTGTT	s243
ВИР 128	VIR	L004	GATCTGG	s270
ВИР 130	VIR	L003	GATCTGG	s227
ВИР 172	VIR	L004	TGCCTAG	s284
ВИР 175	VIR	L004	AACGTAC	s285
ВИР 205Б	VIR	L003	CCTCAGC	s239
ВИР 253	VIR	L005	AGCCGGT	s357
ВИР 340А	VIR	L003	ACGTGAG	s219
ВИР 372	VIR	L005	GGACTCG	s393
ВИР 397	VIR	L005	AGCTTCT	s389
ВИР 434	VIR	L005	TGAACAT	s387
ВИР 434А	VIR	L005	CGATGCG	s406
ВИР 434Б	VIR	L003	GGACATC	s242
ВИР 436А	VIR	L004	ATGGCTC	s341
ВИР 632	VIR	L004	GTGGACG	s302
ВИР 721	VIR	L003	TTGTTAC	s220
ВИР 743	VIR	L004	GGATCGT	s313
ВИР 744	VIR	L005	AGAAGTC	s363
ВИР 759	VIR	L003	TCTCGAC	s209
ВИР 766	VIR	L005	AGTGGCC	s368
ВИР 773	VIR	L004	AACAGAT	s278
ВИР 794	VIR	L004	TACTGTC	s288
ВИР 801	VIR	L003	CCTCTAG	s167
ВИР 814	VIR	L003	TGAACAT	s186
ВИР 820	VIR	L003	TTCTAGT	s184
ВИР 821	VIR	L005	CGAGGTT	s384
ВИР 823	VIR	L005	AACAGAT	s362
ВИР 825	VIR	L005	CCGTAAC	s385
ВИР 833	VIR	L004	TAAGAAC	s315
ВИР 834	VIR	L003	GAACAAT	s222
ВИР 835	VIR	L004	CGAGGTT	s292
ВИР 839	VIR	L004	TTCTGAG	s277
ВИР 845	VIR	L004	TGCGAGG	s323
ВИР 861	VIR	L004	GATGGCT	s345
ВНИИМК 8932	VIR	L005	CGTGGAG	s347
КГ 104	VIR	L003	AGTGGCC	s176
Китай с-03002	VIR	L004	ACTTCTG	s346
Китай Хейя-2	VIR	L003	GTAGGTC	s250
СЛ 2290	VIR	L005	ACTTCTG	s394
x 712	VIR	L003	TGATCTC	s206

## Sheet: 3_tears_test
sample_id	line_name	year	Collection
148/1	ВК732А	2015	VNIIMK
148/2	ВК732А	2015	VNIIMK
148/3	ВК732А	2015	VNIIMK
148/4	ВК732А	2015	VNIIMK
148/5	ВК732А	2015	VNIIMK
149/1	ВК732А	2016	VNIIMK
148/2	ВК732А	2016	VNIIMK
149/3	ВК732А	2016	VNIIMK
149/4	ВК732А	2016	VNIIMK
149/5	ВК732А	2016	VNIIMK
150/1	ВК732А	2017	VNIIMK
150/2	ВК732А	2017	VNIIMK
150/3	ВК732А	2017	VNIIMK
150/4	ВК732А	2017	VNIIMK
150/5	ВК732А	2017	VNIIMK
151/1	ВК876А	2014	VNIIMK
151/2	ВК876А	2014	VNIIMK
151/3	ВК876А	2014	VNIIMK
151/4	ВК876А	2014	VNIIMK
151/5	ВК876А	2014	VNIIMK
152/1	ВК876А	2015	VNIIMK
152/2	ВК876А	2015	VNIIMK
152/3	ВК876А	2015	VNIIMK
152/4	ВК876А	2015	VNIIMK
152/5	ВК876А	2015	VNIIMK
153/1	ВК876А	2016	VNIIMK
153/2	ВК876А	2016	VNIIMK
153/3	ВК876А	2016	VNIIMK
153/4	ВК876А	2016	VNIIMK
153/5	ВК876А	2016	VNIIMK
154/1	ВК906А	2015	VNIIMK
154/2	ВК906А	2015	VNIIMK
154/3	ВК906А	2015	VNIIMK
154/4	ВК906А	2015	VNIIMK
154/5	ВК906А	2015	VNIIMK
155/1	ВК906А	2016	VNIIMK
155/2	ВК906А	2016	VNIIMK
155/3	ВК906А	2016	VNIIMK
155/4	ВК906А	2016	VNIIMK
155/5	ВК906А	2016	VNIIMK
156/1	ВК906А	2017	VNIIMK
156/2	ВК906А	2017	VNIIMK
156/3	ВК906А	2017	VNIIMK
156/4	ВК906А	2017	VNIIMK
156/5	ВК906А	2017	VNIIMK
157/1	ВК931А	2015	VNIIMK
157/2	ВК931А	2015	VNIIMK
157/3	ВК931А	2015	VNIIMK
157/4	ВК931А	2015	VNIIMK
157/5	ВК931А	2015	VNIIMK
158/1	ВК931А	2016	VNIIMK
158/2	ВК931А	2016	VNIIMK
158/3	ВК931А	2016	VNIIMK
158/4	ВК931А	2016	VNIIMK
158/5	ВК931А	2016	VNIIMK
159/1	ВК931А	2017	VNIIMK
159/2	ВК931А	2017	VNIIMK
159/3	ВК931А	2017	VNIIMK
159/4	ВК931А	2017	VNIIMK
159/5	ВК931А	2017	VNIIMK
160/1	ВК934А	2015	VNIIMK
160/2	ВК934А	2015	VNIIMK
160/3	ВК934А	2015	VNIIMK
160/4	ВК934А	2015	VNIIMK
160/5	ВК934А	2015	VNIIMK
161/1	ВК934А	2016	VNIIMK
161/2	ВК934А	2016	VNIIMK
161/3	ВК934А	2016	VNIIMK
161/4	ВК934А	2016	VNIIMK
161/5	ВК934А	2016	VNIIMK
162/1	ВК934А	2017	VNIIMK
162/2	ВК934А	2017	VNIIMK
162/3	ВК934А	2017	VNIIMK
162/4	ВК934А	2017	VNIIMK
162/5	ВК934А	2017	VNIIMK
163/1	ВК935А	2015	VNIIMK
163/2	ВК935А	2015	VNIIMK
163/3	ВК935А	2015	VNIIMK
163/4	ВК935А	2015	VNIIMK
163/5	ВК935А	2015	VNIIMK
164/1	ВК935А	2016	VNIIMK
164/2	ВК935А	2016	VNIIMK
164/3	ВК935А	2016	VNIIMK
164/4	ВК935А	2016	VNIIMK
164/5	ВК935А	2016	VNIIMK
165/1	ВК935А	2017	VNIIMK
165/2	ВК935А	2017	VNIIMK
165/3	ВК935А	2017	VNIIMK
165/4	ВК935А	2017	VNIIMK
165/5	ВК935А	2017	VNIIMK
